# Supplementary material for: Improved Isolation of Mesenchymal Stem Cells Based on Interactions between N-Acetylglucosamine-Bearing Polymers and Cell-Surface Vimentin
Source: Hindawi journal article supplement (doi:10.1155/2019/4341286), 2019-11-11
Supplement: f1 [file 4341286.f1.pdf]

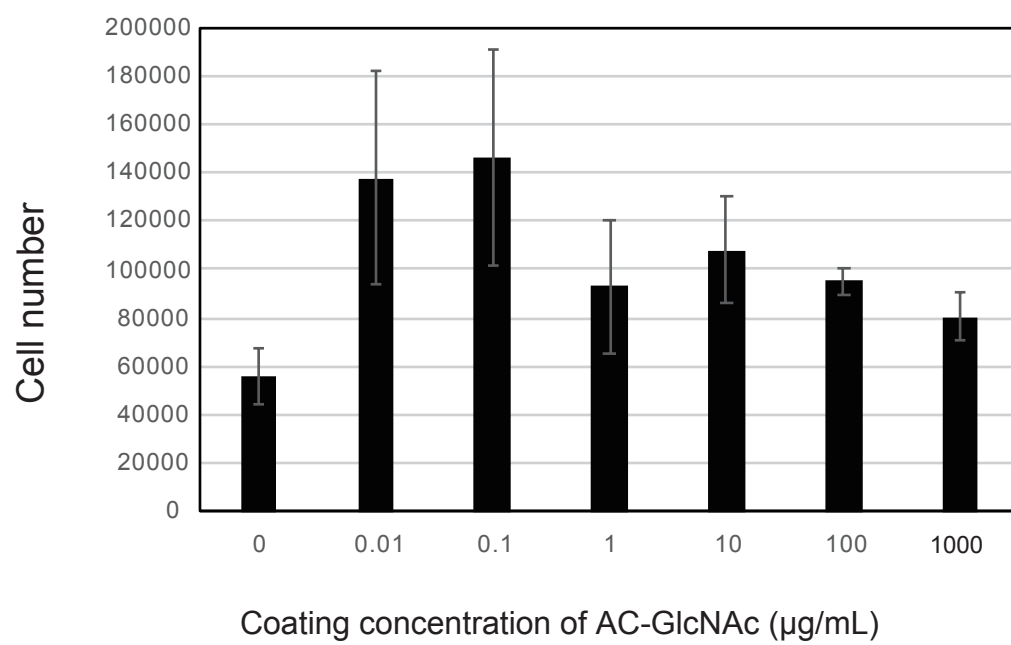

Figure S1: Cell number of the proliferated cells in 0 – 1000 μg/mL AC-GlcNAc-coated dishes at 13 days. Rat bone marrow cells ( $3 \times 10^6$  cells) were seeded on 0 – 1000 μg/mL AC-GlcNAc-coated dishes and were cultured for 13 days.

## CD11b/c

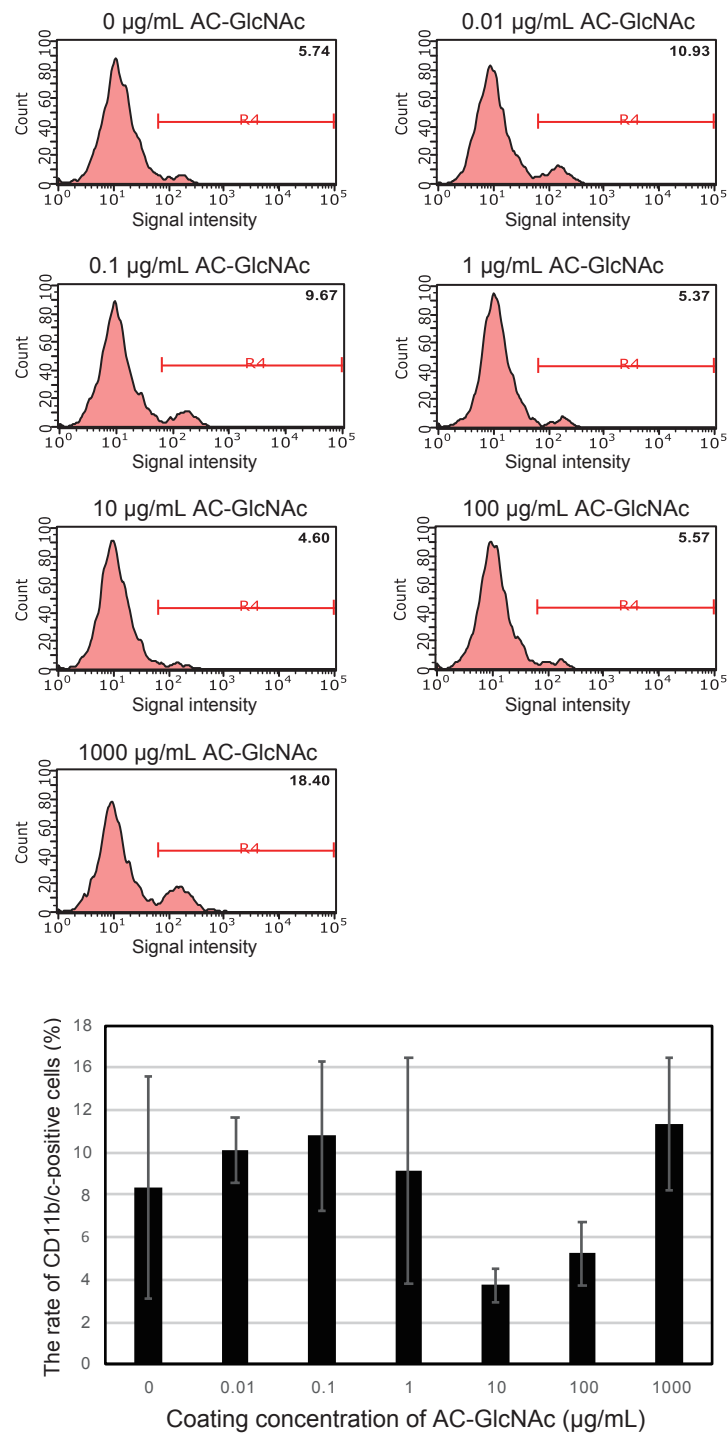

Figure S2: Flow cytometric analysis for CD11b/c expression of the proliferated cells in 0 – 1000  $\mu\text{g/mL}$  AC-GlcNAc-coated dishes at 13 days. The lower bar graph showed the percentage (%) of CD11b/c-positive cells.

## CD90

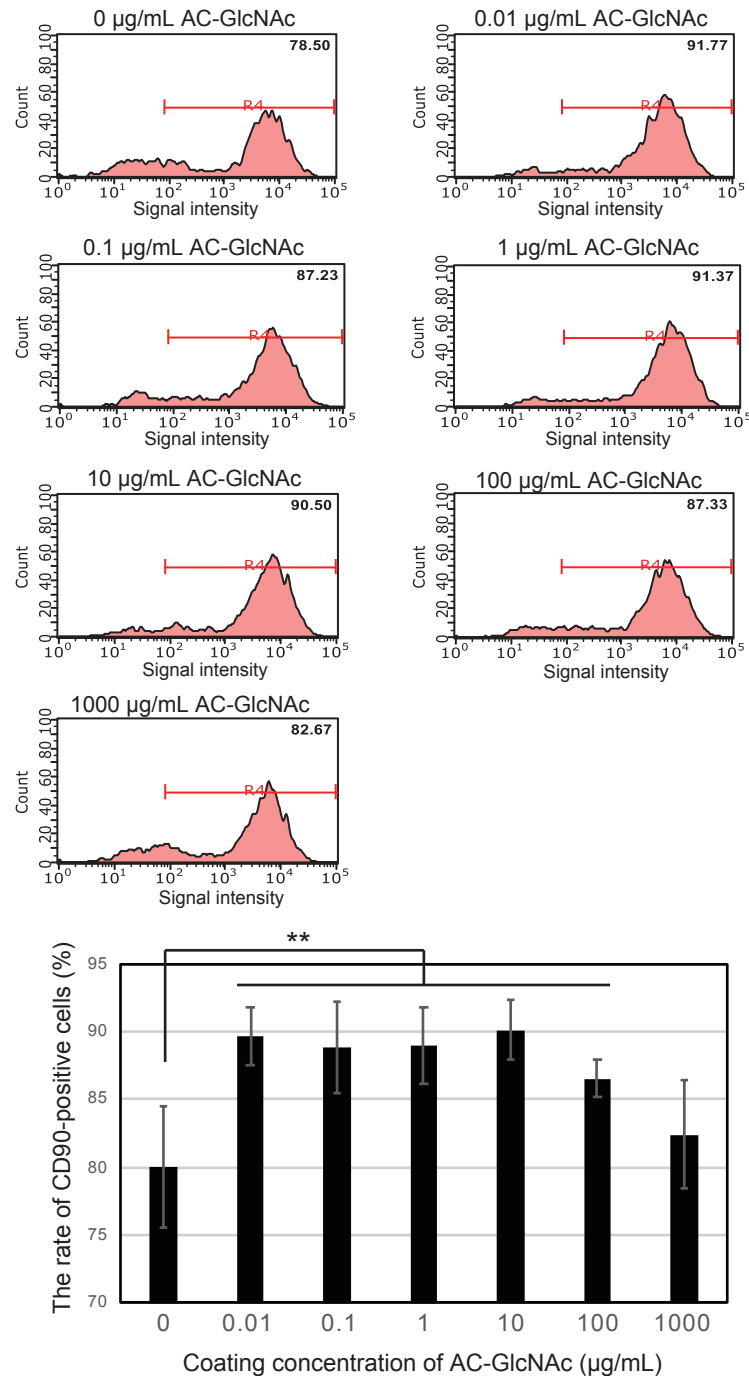

**\*\***  $P < 0.05$ ,  $n = 3$

Figure S3: Flow cytometric analysis for CD90 expression of the proliferated cells in 0 – 1000 µg/mL AC-GlcNAc-coated dishes at 13 days. The lower bar graph showed the percentage (%) of CD90-positive cells.
